# Supplementary material
Source: publisher figshare collection journal article supplement (https://acs.figshare.com/ndownloader/files/3814792)
Supplement: Supplementary file 1 [file 3814792]

## **Supporting Information Available**

**Supplemental Figure S1. The ratio distributions and correlation of the quantified protein levels between Exp. 1 and Exp. 2.**

**Supplemental Figure S2. Detection of vimentin by immunofluorescence staining with a methanol fixed method.**

**Supplemental Figure S3. KPNA2 knockdown does not change the level of pMEK.**

**Supplemental Figure S4. Treatment of cells with a low dose of a DUSP inhibitor restores the pErk level in KPNA2-knockdown cells.**

## Supplemental Figure S1

A

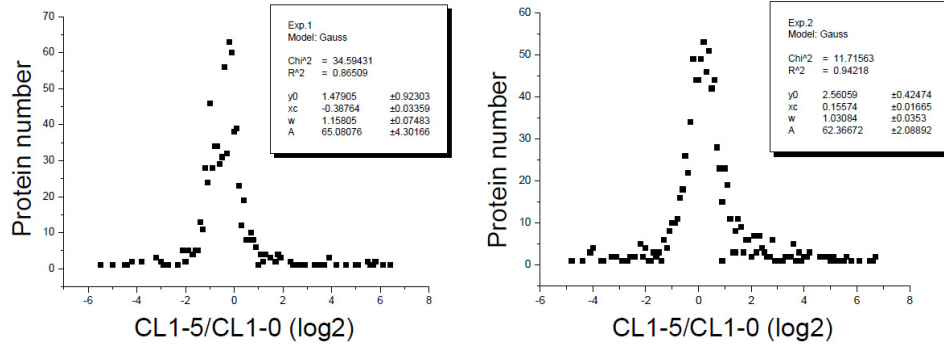

B

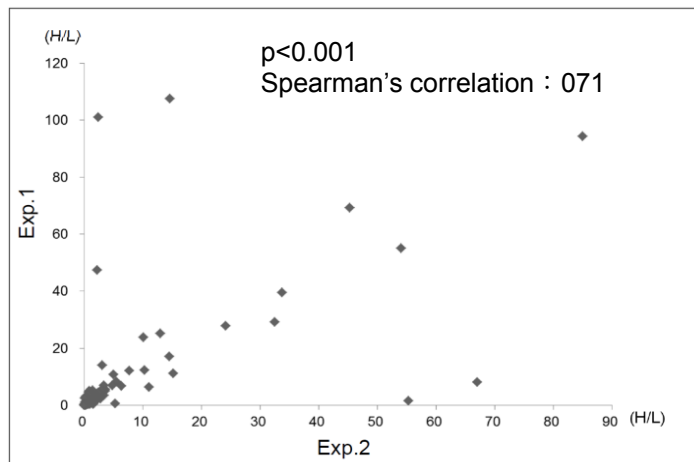

**Supplemental Figure S1. The ratio distributions and correlation of the quantified protein levels between Exp. 1 and Exp. 2.** (A) The log<sub>2</sub> ratio distributions of quantified proteins were fitted with a Gaussian function using Origin 6.0 software (OriginLab Corp., Northampton, MA). The mean (xc) and two standard deviation (w) values were calculated using the following formula:  $y = y_0 + (A / \sqrt{\pi W^2 / 2}) e^{-2((x - xc) / w)^2}$ . (B) The reliability of protein quantification was examined between the two experiments. The linear correlation of the quantification results in Exp. 1 and Exp. 2 was demonstrated by the correlation coefficient of 0.71. A *p* value of less than 0.05 indicates statistical significance according to Spearman's correlation coefficient analysis.

## Supplemental Figure S2

A

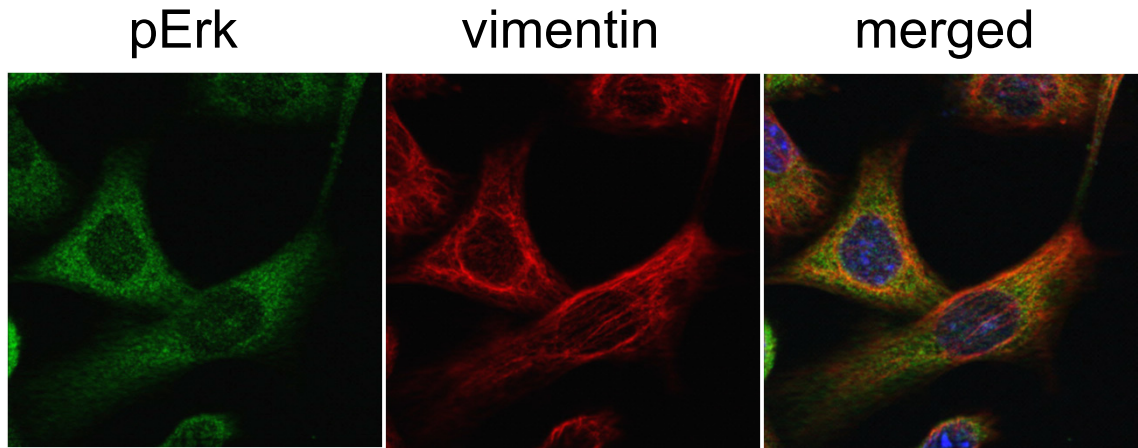

B

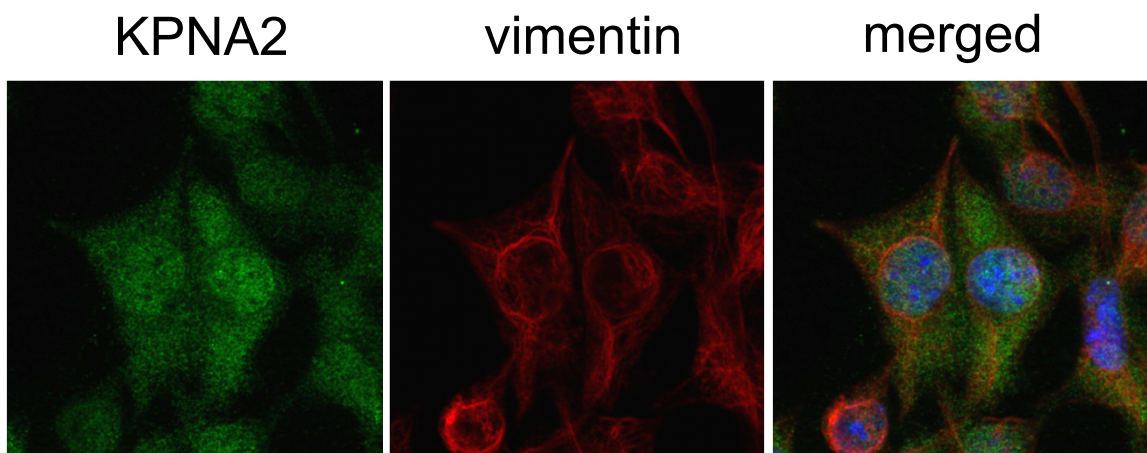

**Supplemental Figure S2. Detection of vimentin by immunofluorescence staining with a methanol fixed method.** CL1-5 cells were fixed by cold methanol for 3 min followed by dual labeling with anti-vimentin and anti-pErk antibodies (A), or anti-vimentin and anti-KPNA2 antibodies (B) to detect the expressions of KPNA2, pErk and vimentin as indicated.

## Supplemental Figure S3

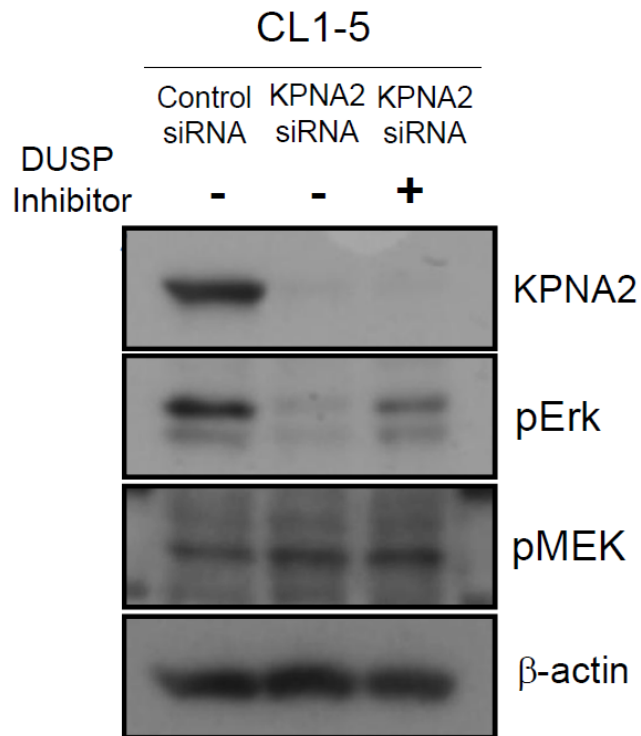

**Supplemental Figure S3. KPNA2 knockdown does not change the level of pMEK.** CL1-5 cells were transfected with control siRNA or KPNA2 siRNA, followed by treatment with DUSP inhibitor (10  $\mu$ M) for 15 min. After treatment, the cells were lysed and analyzed via Western blot using antibodies against KPNA2, pErk and pMEK as indicated.  $\beta$ -actin was used as an internal control.

## Supplemental Figure S4

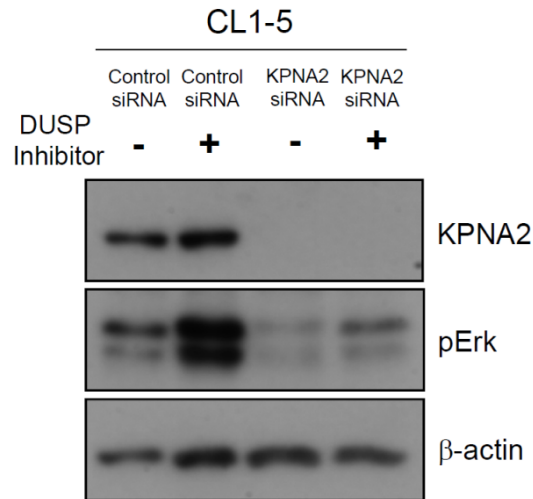

**Supplemental Figure S4. Treatment of cells with a low dose of a DUSP inhibitor restores the pErk level in KPNA2-knockdown cells.** To reduce the cell toxicity caused by DUSP treatment followed by the long-term MTT assay, the CL1-5 cells transfected with control siRNA or KPNA2 siRNA were treated with a DUSP inhibitor (0.25  $\mu$ M) for 15 min. After treatment, the cells were lysed and analyzed via Western blot using anti-KPNA2 and anti-pErk antibodies as indicated.  $\beta$ -actin was used as an internal control.
